# Supplementary material for: Synthesis and biological evaluation of nojirimycin- and pyrrolidine-based trehalase inhibitors
Source: publisher site journal article supplement (doi:10.3762/bjoc.8.58), 2012-04-05
Supplement: Additional file 1 [file 1860-5397-8-58-S1.pdf]

# Supporting Information

for

## Synthesis and biological evaluation of nojirimycin- and pyrrolidine-based trehalase inhibitors

Davide Bini<sup>1</sup>, Francesca Cardona<sup>2</sup>, Matilde Forcella<sup>1</sup>, Camilla Parmeggiani<sup>2,3</sup>, Paolo Parenti<sup>4</sup>, Francesco Nicotra<sup>1</sup>, Laura Cipolla\*<sup>1</sup>

Address: <sup>1</sup>Department of Biotechnology and Biosciences, University of Milano-Bicocca, Piazza della Scienza 2, 20126 Milano, Italy, <sup>2</sup>Department of Chemistry “Ugo Schiff”, University of Florence, Polo Scientifico e Tecnologico, Via della Lastruccia 3–13, 50019 Sesto Fiorentino, Florence, Italy, <sup>3</sup>Present address: CNR-INO U. O. S. Sesto Fiorentino c/o LENS, Via Nello Carrara 1, 50019 Sesto Fiorentino, Florence, Italy and <sup>4</sup>Department of Environmental Sciences, University of Milano-Bicocca, Piazza della Scienza 1, 20126 Milano, Italy.

Email: Laura Cipolla - [laura.cipolla@unimib.it](mailto:laura.cipolla@unimib.it)

\* Corresponding author

Full experimental data

**(2R,3R,4R,5S,6R)-N-benzyl-3,4,5-tris(benzyloxy)-2-((benzyloxy)methyl)-6-**

**propylpiperidine-1-carboxamide (23):** Flash column chromatography (petroleum ether/EtOAc, 87.5:12.5). <sup>1</sup>H NMR (400 MHz, CDCl<sub>3</sub>) δ 7.38–7.00 (m, 25H, ArH), 6.75 (bs, 1H, NH), 4.87–4.20 (m, 10H, CH<sub>2</sub>Ph), 4.02–3.58 (m, 7H, H-2, H-3, H-4, H-5, H-6, H-1'), 1.78–1.32 (m, 4H, CH<sub>2</sub>CH<sub>2</sub>CH<sub>3</sub>), 0.90 (t, *J* = 7.3 Hz, 3H, CH<sub>2</sub>CH<sub>2</sub>CH<sub>3</sub>) ppm; Anal. calcd for C<sub>45</sub>H<sub>50</sub>N<sub>2</sub>O<sub>5</sub>: C, 77.33; H, 7.21; N, 4.01; found: C, 77.30; H, 7.19; N, 3.99.

**(2R,3R,4R,5S,6R)-N-benzyl-3,4,5-trihydroxy-2-(hydroxymethyl)-6-propylpiperidine-1-carboxamide (10):** <sup>1</sup>H NMR (400 MHz, D<sub>2</sub>O) δ 7.36–7.13 (m, 5H, ArH), 4.82–4.54 (m, 2H, H-1'), 4.44 (d, *J* = 15.2 Hz, 1H, CH<sub>2</sub>Ph), 4.33 (d, *J* = 15.1 Hz, 1H, CH<sub>2</sub>Ph), 4.06–3.98 (m, 1H, H-2), 3.97–3.89 (m, 1H, H-6), 3.66–3.34 (m, 3H, H-3, H-4, H-5), 1.72–1.61 (m, 1H, CH<sub>2</sub>CH<sub>2</sub>CH<sub>3</sub>), 1.52–1.38 (m, 1H, CH<sub>2</sub>CH<sub>2</sub>CH<sub>3</sub>), 1.28–1.18 (m, 1H, CH<sub>2</sub>CH<sub>2</sub>CH<sub>3</sub>), 1.14–1.04 (m, 1H, CH<sub>2</sub>CH<sub>2</sub>CH<sub>3</sub>), 0.90–0.72 (m, 3H, CH<sub>2</sub>CH<sub>2</sub>CH<sub>3</sub>) ppm; Anal. calcd for C<sub>17</sub>H<sub>26</sub>N<sub>2</sub>O<sub>5</sub>: C, 60.34; H, 7.74; N, 8.28; found: C, 60.31; H, 7.76; N, 8.25.

**(2R,3R,4R,5S,6R)-2-(hydroxymethyl)-6-propylpiperidine-3,4,5-triol (13):** <sup>1</sup>H NMR (400 MHz, D<sub>2</sub>O) δ 3.69–3.63 (m, 1H, H-4), 3.60–3.40 (m, 5H, H-3, H-5, H-6, H-1'), 3.23–3.13 (m, 1H, H-2), 1.51–1.36 (m, 2H, CH<sub>2</sub>CH<sub>2</sub>CH<sub>3</sub>), 1.35–1.19 (m, 2H, CH<sub>2</sub>CH<sub>2</sub>CH<sub>3</sub>), 0.77 (t, *J* = 7.3 Hz, 3H, CH<sub>2</sub>CH<sub>2</sub>CH<sub>3</sub>) ppm; <sup>13</sup>C NMR (100.57 MHz, D<sub>2</sub>O) δ 71.85 (d, C-5), 68.94 (d, C-4), 67.79 (d, C-3), 62.46 (t, C-1'), 55.32 (d, C-2), 55.21 (d, C-6), 26.30 (t, CH<sub>2</sub>CH<sub>2</sub>CH<sub>3</sub>), 19.15 (t, CH<sub>2</sub>CH<sub>2</sub>CH<sub>3</sub>), 12.87 (q, CH<sub>2</sub>CH<sub>2</sub>CH<sub>3</sub>) ppm; MS (TOF) *m/z*: 206.1 [M + H]<sup>+</sup>; found 206.3; Anal. calcd for C<sub>9</sub>H<sub>19</sub>NO<sub>4</sub>: C, 52.66; H, 9.33; N, 6.82; found: C, 52.68; H, 9.31; N, 6.80.

**(2R,3R,4R,5S)-N-benzyl-3,4,5-tris(benzyloxy)-2-((benzyloxy)methyl)piperidine-1-carboxamide (25):** Flash column chromatography (petroleum ether/EtOAc 75:25).

<sup>1</sup>H NMR (400 MHz, CDCl<sub>3</sub>) δ 7.32–7.17 (m, 25H, ArH), 5.85 (bs, 1H, NH), 4.73 (dd, *J* = 11.6, 8.1 Hz, 2H, CH<sub>2</sub>Ph), 4.63 (s, 2H, CH<sub>2</sub>Ph), 4.52 (dd, *J* = 21.0, 11.6 Hz, 2H, CH<sub>2</sub>Ph), 4.40 (d, *J* = 2.7 Hz, 2H, CH<sub>2</sub>Ph), 4.32 (d, *J* = 3.5 Hz, 2H, NHCH<sub>2</sub>Ph), 4.09–4.03 (m, 1H, H-

2), 3.96 (dd,  $J = 14.1, 4.4$  Hz, 1H, Ha-6), 3.80–3.73 (m, 1H, H-4), 3.70 (dd,  $J = 8.8, 4.4$  Hz, 1H, H-3), 3.63 (dd,  $J = 9.6, 3.5$  Hz, 1H, Ha-1'), 3.60–3.53 (m, 2H, H-5, Hb-1'), 3.32 (dd,  $J = 14.1, 3.7$  Hz, 1H, Hb-6) ppm;  $^{13}\text{C}$  NMR (100.57 MHz,  $\text{CDCl}_3$ )  $\delta$  159.45 (s, C=O), 139.82, 138.36, 138.24, 138.12, 137.67 (s, CAr), 128.68–127.16 (d, CHAR), 82.33 (d, C-4), 79.05 (d, C-3), 76.04 (d, C-5), 73.60, 73.24 (t,  $\text{CH}_2\text{Ph}$ ), 71.22 (t, C-1'), 57.31 (d, C-2), 45.20 (t,  $\text{NHCH}_2\text{Ph}$ ), 41.00 (t, C-6) ppm; Anal. calcd for  $\text{C}_{42}\text{H}_{44}\text{N}_2\text{O}_5$ : C, 76.80; H, 6.75; N, 4.26; found: C, 76.78; H, 6.71; N, 4.28.

**(2R,3R,4R,5S)-3,4,5-trihydroxy-2-(hydroxymethyl)piperidine-1-carboxamide (12):**

$^1\text{H}$  NMR (400 MHz,  $\text{D}_2\text{O}$ )  $\delta$  3.74–3.69 (m, 1H, H-2), 3.69–3.54 (m, 4H, H-5, Ha-6, H-1'), 3.54–3.49 (m, 1H, H-3), 3.45–3.40 (m, 1H, H-4), 3.22 (dd,  $J = 14.9, 3.2$  Hz, 1H, Hb-6) ppm;  $^{13}\text{C}$  NMR (100.57 MHz,  $\text{D}_2\text{O}$ )  $\delta$  161.15 (s, C=O), 73.11 (d, C-4), 70.59 (d, C-5), 68.07 (d, C-3), 59.72 (d, C-2), 59.46 (t, C-1'), 43.78 (t, C-6) ppm; MS (TOF)  $m/z$ : 207.1  $[\text{M} + \text{H}]^+$ ; found 207.3.

**(2R,3R,4R,5R)-2-(hydroxymethyl)-5-propylpyrrolidine-3,4-diol (14):**  $^1\text{H}$  NMR (400 MHz,  $\text{D}_2\text{O}$ )  $\delta$  3.89 (dd,  $J = 13.7, 6.5$  Hz, 1H, H-3), 3.83–3.64 (m, 3H, H-4, H-1'), 3.39 (bs, 1H, H-2), 3.26 (dd,  $J = 14.1, 8.0$  Hz, 1H, H-5), 1.70 (dt,  $J = 15.1, 6.4$  Hz, 1H,  $\text{CH}_2\text{CH}_2\text{CH}_3$ ), 1.57 (dt,  $J = 14.2, 8.7$  Hz, 1H,  $\text{CH}_2\text{CH}_2\text{CH}_3$ ), 1.28 (dt,  $J = 14.7, 7.5$  Hz, 2H,  $\text{CH}_2\text{CH}_2\text{CH}_3$ ), 0.78 (t,  $J = 7.1$  Hz, 3H,  $\text{CH}_2\text{CH}_2\text{CH}_3$ ) ppm;  $^{13}\text{C}$  NMR (100.57 MHz,  $\text{D}_2\text{O}$ )  $\delta$  77.98 (d, C-4), 74.06 (d, C-3), 61.92 (d, C-2), 61.09 (d, C-5), 57.78 (t, C-1'), 32.08 (t,  $\text{CH}_2\text{CH}_2\text{CH}_3$ ), 18.58 (t,  $\text{CH}_2\text{CH}_2\text{CH}_3$ ), 12.73 (q,  $\text{CH}_2\text{CH}_2\text{CH}_3$ ) ppm; MS (TOF)  $m/z$ : 176.1  $[\text{M} + \text{H}]^+$ ; found 176.2; Anal. calcd for  $\text{C}_8\text{H}_{17}\text{NO}_3$ : C, 54.83; H, 9.78; N, 7.99; found: C, 54.80; H, 10.00; N, 8.01.

**(2R,3R,4S,5S)-2-(hydroxymethyl)-5-propylpyrrolidine-3,4-diol (17):**  $^1\text{H}$  NMR (400 MHz,  $\text{D}_2\text{O}$ )  $\delta$  4.10 (t,  $J = 5.4$  Hz, 1H, H-3), 3.97 (t,  $J = 5.8$  Hz, 1H, H-4), 3.82 (dd,  $J = 12.6, 3.8$  Hz, 1H, Ha-1'), 3.73 (dd,  $J = 12.6, 6.0$  Hz, 1H, Hb-1'), 3.55 (dd,  $J = 9.4, 4.6$  Hz, 1H, H-2), 3.45 (dd,  $J = 14.1, 7.2$  Hz, 1H, H-5), 1.76–1.56 (m, 2H,  $\text{CH}_2\text{CH}_2\text{CH}_3$ ), 1.43–1.29 (m, 2H,  $\text{CH}_2\text{CH}_2\text{CH}_3$ ), 0.85 (t,  $J = 7.3$  Hz, 3H,  $\text{CH}_2\text{CH}_2\text{CH}_3$ ) ppm;  $^{13}\text{C}$  NMR (100.57 MHz,  $\text{D}_2\text{O}$ )  $\delta$

74.26 (d, C-4), 71.09 (d, C-3), 64.97 (d, C-2), 63.60 (d, C-5), 59.13 (t, C-1'), 32.50 (t, CH<sub>2</sub>CH<sub>2</sub>CH<sub>3</sub>), 19.86 (t, CH<sub>2</sub>CH<sub>2</sub>CH<sub>3</sub>), 13.69 (q, CH<sub>2</sub>CH<sub>2</sub>CH<sub>3</sub>) ppm; MS (TOF) *m/z*: 176.1 [M + H]<sup>+</sup>; found 176.2; Anal. calcd for C<sub>8</sub>H<sub>17</sub>NO<sub>3</sub>: C, 54.83; H, 9.78; N, 7.99; found: C, 54.85; H, 9.75; N, 7.96.

**(2R,3R,4R,5R)-N-benzyl-3,4-bis(benzyloxy)-2-((benzyloxy)methyl)-5-**

**propylpyrrolidine-1-carboxamide (28):** Flash column chromatography (petroleum ether/EtOAc 75:25). <sup>1</sup>H NMR (400 MHz, CDCl<sub>3</sub>) δ 7.41–7.10 (m, 20H, ArH), 5.50 (bs, 1H, NH), 4.64–4.30 (m, 8H, CH<sub>2</sub>Ph), 4.14–4.05 (m, 1H, H-2), 3.99 (m, 1H, H-4), 3.91 (m, 1H, H-5), 3.85–3.69 (m, 2H, H-3, Ha-1'), 3.58–3.50 (m, 1H, Hb-1'), 2.03 (m, 1H, CH<sub>2</sub>CH<sub>2</sub>CH<sub>3</sub>), 1.61 (m, 1H, CH<sub>2</sub>CH<sub>2</sub>CH<sub>3</sub>), 1.37–1.20 (m, 2H, CH<sub>2</sub>CH<sub>2</sub>CH<sub>3</sub>), 0.91 (t, *J* = 7.3 Hz, 3H, CH<sub>2</sub>CH<sub>2</sub>CH<sub>3</sub>) ppm; <sup>13</sup>C NMR (100.57 MHz, CDCl<sub>3</sub>) δ 157.67 (s, C=O), 140.57–138.56 (s, C Ar), 129.38–127.95 (d, CH Ar), 83.89 (d, C-4), 82.90 (d, C-3), 74.10–71.73 (t, CH<sub>2</sub>Ph, C-1'), 65.42 (d, C-5), 63.77 (d, C-2), 45.54 (t, NHCH<sub>2</sub>Ph), 33.55 (t, CH<sub>2</sub>CH<sub>2</sub>CH<sub>3</sub>), 20.89 (t, CH<sub>2</sub>CH<sub>2</sub>CH<sub>3</sub>), 14.85 (q, CH<sub>2</sub>CH<sub>2</sub>CH<sub>3</sub>) ppm; MS (TOF) *m/z*: 579.3 [M + H]<sup>+</sup>; found 579.6; Anal. calcd for C<sub>37</sub>H<sub>42</sub>N<sub>2</sub>O<sub>4</sub>: C, 76.79; H, 7.31; N, 4.84; found: C, 76.81; H, 7.28; N, 4.81.

**(2R,3R,4S,5S)-N-benzyl-3,4-bis(benzyloxy)-2-((benzyloxy)methyl)-5-**

**propylpyrrolidine-1-carboxamide (29):** Flash column chromatography (petroleum ether/EtOAc 25:75). <sup>1</sup>H NMR (400 MHz, CDCl<sub>3</sub>) δ 7.41–7.11 (m, 20H, ArH), 6.73 (bs, 1H, NH), 4.75–4.23 (m, 9H, H-1, CH<sub>2</sub>Ph), 4.05 (m, 1H, H-2), 3.76–3.66 (m, 3H, H-4, H-3, Ha-1'), 3.40 (t, *J* = 9.0 Hz, 1H, Hb-1'), 1.49–1.40 (m, 1H, CH<sub>2</sub>CH<sub>2</sub>CH<sub>3</sub>), 1.39–1.31 (m, 1H, CH<sub>2</sub>CH<sub>2</sub>CH<sub>3</sub>), 1.29–1.18 (m, 2H, CH<sub>2</sub>CH<sub>2</sub>CH<sub>3</sub>), 0.90 (t, *J* = 7.2 Hz, 3H, CH<sub>2</sub>CH<sub>2</sub>CH<sub>3</sub>) ppm; <sup>13</sup>C NMR (100.57 MHz, CDCl<sub>3</sub>) δ 160.26 (s, C=O), 140.71, 138.74, 138.33, 137.85 (s, C Ar), 129.38–127.68 (d, CH Ar), 80.82 (d, C-4), 77.43 (d, C-3), 75.53, 74.21, 72.60, 71.43 (t, C-1', CH<sub>2</sub>Ph), 61.94 (d, C-5, C-2), 45.48 (t, NHCH<sub>2</sub>Ph), 37.35 (t, CH<sub>2</sub>CH<sub>2</sub>CH<sub>3</sub>), 20.48 (t, CH<sub>2</sub>CH<sub>2</sub>CH<sub>3</sub>), 15.02 (q, CH<sub>2</sub>CH<sub>2</sub>CH<sub>3</sub>) ppm; MS (TOF) *m/z*: 579.3 [M + H]<sup>+</sup>; found 579.6; Anal. calcd for C<sub>37</sub>H<sub>42</sub>N<sub>2</sub>O<sub>4</sub>: C, 76.79; H, 7.31; N, 4.84; found: C, 76.77; H, 7.33; N, 4.85.

**(2R,3R,4R,5R)-3,4-dihydroxy-2-(hydroxymethyl)-5-propylpyrrolidine-1-carboxamide**

**(16):**  $^1\text{H}$  NMR (400 MHz,  $\text{D}_2\text{O}$ )  $\delta$  3.95 (d,  $J = 12.8$  Hz, 1H, H-3), 3.87 (d,  $J = 11.7$  Hz, 1H, H-4), 3.65–3.54 (m, 3H, H-2, H-1'), 3.47–3.39 (m, 1H, H-5), 1.69–1.49 (m, 1H,  $\text{CH}_2\text{CH}_2\text{CH}_3$ ), 1.47–1.31 (m, 1H,  $\text{CH}_2\text{CH}_2\text{CH}_3$ ), 1.23–1.04 (m, 2H,  $\text{CH}_2\text{CH}_2\text{CH}_3$ ), 0.73–0.67 (m, 3H,  $\text{CH}_2\text{CH}_2\text{CH}_3$ ) ppm;  $^{13}\text{C}$  NMR (100.57 MHz,  $\text{D}_2\text{O}$ )  $\delta$  158.15 (s, C=O), 77.74, 77.62 (d, C-3, C-4), 66.47 (d, C-2), 65.93 (d, C-5), 59.87 (t, C-1'), 31.43 (t,  $\text{CH}_2\text{CH}_2\text{CH}_3$ ), 18.60 (t,  $\text{CH}_2\text{CH}_2\text{CH}_3$ ), 13.05 (q,  $\text{CH}_2\text{CH}_2\text{CH}_3$ ) ppm; MS (TOF)  $m/z$ : 219.1 [ $\text{M} + \text{H}$ ] $^+$ ; found 219.2.

**(2R,3R,4S,5S)-3,4-dihydroxy-2-(hydroxymethyl)-5-propylpyrrolidine-1-carboxamide**

**(19):**  $^1\text{H}$  NMR (400 MHz, acetone)  $\delta$  4.30–4.04 (m, 1H, Ha-1'), 3.91 (bs, 1H, Hb-1'), 3.84 (d,  $J = 9.4$  Hz, 1H, H-4), 3.81–3.75 (m, 1H, H-5), 3.70 (t,  $J = 6.0$  Hz, 1H, H-2), 3.54–3.46 (m, 1H, H-3), 1.66–1.31 (m, 4H,  $\text{CH}_2\text{CH}_2\text{CH}_3$ ), 0.91 (t,  $J = 7.0$  Hz, 3H,  $\text{CH}_2\text{CH}_2\text{CH}_3$ ) ppm;  $^{13}\text{C}$  NMR (100.57 MHz,  $\text{D}_2\text{O}$ )  $\delta$  160.68 (s, C=O), 73.38, 71.94 (d, C-3, C-4), 63.97, 63.62 (d, C-2, C-5), 61.33 (t, C-1'), 34.18 (t,  $\text{CH}_2\text{CH}_2\text{CH}_3$ ), 18.42 (t,  $\text{CH}_2\text{CH}_2\text{CH}_3$ ), 13.23 (t,  $\text{CH}_2\text{CH}_2\text{CH}_3$ ) ppm; MS (TOF)  $m/z$ : 219.1 [ $\text{M} + \text{H}$ ] $^+$ ; found 219.2.

**(2R,3R,4R)-1-octyl-2-(hydroxymethyl)pyrrolidin-3,4-diol (20):** To a solution of nitron

**30** (188 mg, 0.45 mmol) in MeOH (8 mL), Pd/C (420 mg) and concentrated HCl

(four drops) were added. The mixture was stirred under  $\text{H}_2$  atmosphere at rt for 15 h, then filtered through Celite and concentrated under reduced pressure to obtain the

corresponding trihydroxy pyrrolidine chloridate (75 mg, 0.44 mmol) in 98% yield. This was

dissolved in MeOH (3 mL), and then acetic acid (0.02 mL),  $\text{Na}(\text{CN})\text{BH}_3$  (28 mg, 0.44

mmol) and octanal (83  $\mu\text{L}$ , 0.53 mmol) were added. The reaction mixture was stirred at rt

for 8 h, then the solvent was removed under reduced pressure. The crude was passed

through an ion-exchange resin Dowex WX8-200 and eluted with MeOH, water and a 6%

solution of  $\text{NH}_4\text{OH}$ . Subsequent purification on silica gel (eluent:  $\text{CH}_2\text{Cl}_2/\text{MeOH}/\text{NH}_4\text{OH}$

33% 10:1:0.1,  $R_f$  0.1 ) gave pure **20** (37 mg, 0.15 mmol), in 33% yield as yellow pale oil.  $^1\text{H}$

NMR (400 MHz,  $\text{CD}_3\text{OD}$ )  $\delta$  3.96–3.94 (m, 1H, H-4), 3.90–3.87 (m, 1H, H-3), 3.68 (m, 2H,

H-1'), 3.07 (d,  $J = 10.2$  Hz, 1H, Ha-5), 2.88 (m, 1H, NCH<sub>2</sub>), 2.73 (dd,  $J = 10.2, 4.4$  Hz, 1H, Hb-5), 2.52 (bs, 1H, H-2), 2.43–2.37 (m, 1H, NCH<sub>2</sub>), 1.54–1.50 (m, 2H), 1.31–1.30 (m, 10H), 0.89 (t,  $J = 6.8$  Hz, 3H, Me) ppm; <sup>13</sup>C NMR (50.29 MHz, CD<sub>3</sub>OD)  $\delta$  78.1 (d, C-3), 74.8 (d, C-4), 72.7 (d, C-2), 60.1 (t, C-1'), 58.3 (t, C-5), 54.8 (t, NCH<sub>2</sub>), 30.7, 28.3, 28.1, 26.5, 26.2, 21.4 (t, CH<sub>2</sub>), 12.1 (q, CH<sub>3</sub>) ppm; ESIMS  $m/z$ : 246.33 ([M + H]<sup>+</sup>, 100); Anal. calcd for C<sub>13</sub>H<sub>27</sub>NO<sub>3</sub>: C, 63.64; H, 11.09; N, 5.71; found: C, 63.78; H, 11.15; N, 5.54.

**(2R,3R,4R,5R)-3,4-bis(benzyloxy)-2-[(benzyloxy) methyl]-5-octylpyrrolidin-1-ol (31):**

To a solution of nitrone **30** (510 mg, 1.22 mmol) in dry THF (16 mL), a 2 M solution of octylmagnesium bromide in Et<sub>2</sub>O (2.14 mmol) at -75 °C was added. After 3 h the temperature was raised to rt and the mixture controlled by TLC (eluent: petroleum ether/EtOAc 1:1) showing the disappearance of the starting material and the formation of a new product. The mixture was treated with a saturated aqueous solution of NaHCO<sub>3</sub> (12 mL) at 0 °C and extracted with Et<sub>2</sub>O. The crude, obtained after evaporation of the solvent under reduced pressure, was purified by FCC (eluent: petroleum ether/EtOAc 5:1,  $R_f$  0.2) to obtain pure **31** (540 mg, 1.02 mmol) in 84% yield as a white solid. <sup>1</sup>H NMR (400 MHz, CDCl<sub>3</sub>)  $\delta$  7.32–7.25 (m, 15H, Ar), 4.55–4.42 (m, 6H, Bn), 3.93 (dd,  $J = 3.9, 2.9$  Hz, 1H, H-3), 3.79 (dd,  $J = 5.1, 2.9$  Hz, 1H, H-4), 3.77–3.75 (m, 1H, Ha-1'), 3.65–3.57 (m, 1H, Hb-1'), 3.52 (dd,  $J = 10.5, 5.1$  Hz, 1H, H-2), 3.22–3.17 (m, 1H, H-5), 1.85–1.79 (m, 1H, CHCH<sub>2</sub>), 1.58–1.53 (m, 1H), 1.50–1.43 (m, 1H, CHCH<sub>2</sub>), 1.29–1.25 (m, 11H), 0.87 (t,  $J = 6.8$  Hz, 3H, Me) ppm; <sup>13</sup>C NMR (50.29 MHz, CDCl<sub>3</sub>)  $\delta$  138.2–138.1 (s, 3C, Ar), 128.5–127.5 (d, 15C, Ar), 86.8 (d, C-4), 84.6 (d, C-3), 73.4 (t, Bn), 71.7 (t, 2C, Bn), 70.1 (d, C-5), 70.0 (d, C-2), 68.3 (t, C-1'), 32.1 (t), 30.1–29.5 (t, 4C), 26.8 (t), 22.9 (t), 14.4 (q, CH<sub>3</sub>) ppm; ESIMS  $m/z$ : 532.65 ([M + H]<sup>+</sup>, 32), 554.75 ([M + Na]<sup>+</sup>, 100); Anal. calcd for C<sub>34</sub>H<sub>45</sub>NO<sub>4</sub>: C, 76.80; H, 8.53; N, 2.63; found: C, 76.53; H, 8.42; N, 2.36.

**(2R,3R,4R,5R)-2-(hydroxymethyl)-5-octylpyrrolidin-3,4-diol (21):** To a solution of hydroxypyrrrolidine **31** (287 mg, 0.54 mmol) in MeOH (25 mL), Pd/C (150 mg) and HCl

37% (two drops) were added, and the mixture was stirred under H<sub>2</sub> atmosphere at rt overnight and then filtered through Celite and concentrated under reduced pressure. The obtained crude was passed through an ion-exchange resin Dowex WX8-200 eluting with MeOH, water and a 6% solution of NH<sub>4</sub>OH, to obtain pure **21** (96 mg, 0.39 mmol) in 73% yield as a yellow solid, mp 113 °C (dec.). <sup>1</sup>H NMR (400 MHz, CD<sub>3</sub>OD) δ 3.76 (t, *J* = 6.4 Hz, 1H, H-3), 3.67 (dd, *J* = 11.2, 3.9 Hz, 1H, Ha-1'), 3.62–3.56 (m, 2H, Hb-1', H-4), 3.01 (dt, *J* = 6.3, 4.4 Hz, 1H, H-2), 3.89 (dt, *J* = 7.3, 5.4 Hz, 1H, H-5), 1.71–1.66 (m, 1H, CH<sub>2</sub>), 1.47–1.41 (m, 1H, CH<sub>2</sub>), 1.32–1.29 (m, 12H, CH<sub>2</sub>), 0.89 (t, *J* = 6.8 Hz, 3H, Me) ppm; <sup>13</sup>C NMR (50.29 MHz, CD<sub>3</sub>OD) δ 81.9 (d, C-4), 77.9 (d, C-3), 63.2 (d, C-2), 61.6 (t + d, 2C, C-5, C-1'), 33.7, 31.8, 29.6, 29.4, 26.5, 22.5 (t, 6C), 13.3 (q, CH<sub>3</sub>) ppm; ESIMS *m/z*: 246.32 ([M + H]<sup>+</sup>, 87), 268.46 ([M + Na]<sup>+</sup>, 100); Anal. calcd for C<sub>13</sub>H<sub>27</sub>NO<sub>3</sub>: C, 63.64; H, 11.09; N, 5.71; found: C, 63.69; H, 10.86; N, 5.49.
